# Supplementary material for: Using Facebook to promote the uptake of colorectal cancer screening
Source: Springer Nature journal article supplement (doi:10.1186/s12889-022-12732-w), 2022-02-15
Supplement: MOESM1 [file 20138568]

Additional File 1. List of messages tested in focus groups.

The messages are presented in the following format as per Facebook ad layout

# --- Message #

50 or older? You may be at risk for colon cancer. --- Primary headline

<IMAGE TBC> --- Image placeholder

GETCHECKEDTODAY.CA --- Website link

**Get checked today --- Headline**

**LEARN MORE --- Call to action button**

|                                                                                                                                                                                                                                             |                                                                                                                                                                                                                                                                             |
|---------------------------------------------------------------------------------------------------------------------------------------------------------------------------------------------------------------------------------------------|-----------------------------------------------------------------------------------------------------------------------------------------------------------------------------------------------------------------------------------------------------------------------------|
| <p><b>#1</b><br/>         Did you know your risk of colon cancer increases after 50?<br/>         &lt;IMAGE TBC&gt;<br/>         GETCHECKEDTODAY.CA<br/> <b>Get checked today</b><br/> <b>LEARN MORE</b></p>                                | <p><b>#10</b><br/>         Because taking care of your health is never embarrassing.<br/>         &lt;IMAGE TBC&gt;<br/>         GETCHECKEDTODAY.CA<br/> <b>Get checked for colon cancer today</b><br/> <b>LEARN MORE</b></p>                                               |
| <p><b>#2</b><br/>         You could have colon cancer right now—and have no clue.<br/>         &lt;IMAGE TBC&gt;<br/>         GETCHECKEDTODAY.CA<br/> <b>Now's the time to get tested</b><br/> <b>LEARN MORE</b></p>                        | <p><b>#11</b><br/>         Are you 50-74 years old? Healthcare providers recommend you get checked for colon cancer every 2 years.<br/>         &lt;IMAGE TBC&gt;<br/>         GETCHECKEDTODAY.CA<br/> <b>Get checked for colon cancer today</b><br/> <b>LEARN MORE</b></p> |
| <p><b>#3</b><br/>         9 out of 10 people can be cured when colon cancer is found early.<br/>         &lt;IMAGE TBC&gt;<br/>         GETCHECKEDTODAY.CA<br/> <b>50 to 74? Get checked today</b><br/> <b>LEARN MORE</b></p>               | <p><b>#12</b><br/>         Don't flush it away. Test your poop for colon cancer today. It's easy and can be done at home.<br/>         &lt;IMAGE TBC&gt;<br/>         GETCHECKEDTODAY.CA<br/> <b>Get checked today</b><br/> <b>LEARN MORE</b></p>                           |
| <p><b>#4</b><br/>         Getting checked for colon cancer is easy and can be done in the privacy of your own home.<br/>         &lt;IMAGE TBC&gt;<br/>         GETCHECKEDTODAY.CA<br/> <b>Get checked today</b><br/> <b>LEARN MORE</b></p> | <p><b>#14</b><br/>         Because living with half a colon isn't easy.<br/>         &lt;IMAGE TBC&gt;<br/>         GETCHECKEDTODAY.CA<br/> <b>50 to 74? Get tested for colon cancer</b><br/> <b>LEARN MORE</b></p>                                                         |

|                                                                                                                                                                                                                                                                |                                                                                                                                                                                                                                                                                                                |
|----------------------------------------------------------------------------------------------------------------------------------------------------------------------------------------------------------------------------------------------------------------|----------------------------------------------------------------------------------------------------------------------------------------------------------------------------------------------------------------------------------------------------------------------------------------------------------------|
| <p><b>#5</b><br/> Think you don't need to get checked for colon cancer because no one in your family has had it? Think again.<br/> &lt;IMAGE TBC&gt;<br/> GETCHECKEDTODAY.CA<br/> <b>Talk to your healthcare provider today</b><br/> <b>LEARN MORE</b></p>     | <p><b>#17</b><br/> Everyone passes poop. Now, let's see if your poop passes the test.<br/> &lt;IMAGE TBC&gt;<br/> GETCHECKEDTODAY.CA<br/> <b>Get checked for colon cancer today</b><br/> <b>LEARN MORE</b></p>                                                                                                 |
| <p><b>#6</b><br/> "Checking for colon cancer was easy, quick and private."— &lt;First Name&gt;<br/> &lt;Image featuring a headshot of a patient/the source of quote above&gt;<br/> GETCHECKEDTODAY.CA<br/> <b>Get checked today</b><br/> <b>LEARN MORE</b></p> | <p><b>#21</b><br/> If you're 50-74, it's time to get your rear in gear.<br/> &lt;IMAGE TBC&gt;<br/> GETCHECKEDTODAY.CA<br/> <b>Get checked for colon cancer today</b><br/> <b>LEARN MORE</b></p>                                                                                                               |
| <p><b>#7</b><br/> Colon cancer kills 9,000+ Canadians every year. Don't be one of them.<br/> &lt;IMAGE TBC&gt;<br/> GETCHECKEDTODAY.CA<br/> <b>This quick test can protect your health</b><br/> <b>LEARN MORE</b></p>                                          | <p><b>#22</b><br/> Think you don't have the time to get tested? Treating colon cancer takes even longer.<br/> &lt;IMAGE TBC&gt;<br/> GETCHECKEDTODAY.CA<br/> <b>Get checked for colon cancer today</b><br/> <b>LEARN MORE</b></p>                                                                              |
| <p><b>#8</b><br/> You want to be there for all the big moments. Make sure colon cancer doesn't get in the way.<br/> &lt;Image of a family&gt;<br/> GETCHECKEDTODAY.CA<br/> <b>50 to 74? Get checked today</b><br/> <b>LEARN MORE</b></p>                       | <p><b>#23</b><br/> Colon cancer can take years before it grows enough to make you sick. But why wait that long?<br/> &lt;IMAGE TBC&gt;<br/> GETCHECKEDTODAY.CA<br/> <b>Get checked for colon cancer today</b><br/> <b>LEARN MORE</b></p>                                                                       |
| <p><b>#9</b><br/> Protect your health by getting checked for colon cancer.<br/> &lt;IMAGE TBC&gt;<br/> GETCHECKEDTODAY.CA<br/> <b>Find out about home testing</b><br/> <b>LEARN MORE</b></p>                                                                   | <p><b>#24</b><br/> "I'm so grateful that I took the time to get tested for colon cancer. Those few minutes saved my life."— &lt;First Name&gt;<br/> &lt;Image featuring a headshot of a patient/the source of quote above&gt;<br/> GETCHECKEDTODAY.CA<br/> <b>Get checked today</b><br/> <b>LEARN MORE</b></p> |
